# Supplementary material for: Evaluation of Cold Chain Management Performance for Temperature-Sensitive Pharmaceuticals at Public Health Facilities Supplied by the Jimma Pharmaceuticals Supply Agency Hub, Southwest Ethiopia: Pharmaceuticals Logistic Management Perspective Using a Multicentered, Mixed-Method Approach
Source: Adv Pharmacol Pharm Sci. 2021 Sep 14;2021:5167858. doi: 10.1155/2021/5167858 (PMC8455189; doi:10.1155/2021/5167858)
Supplement: Supplementary Materials — Supplementary Table 1: list of 13 key temperature sensitive medicines (8-WHO tracer vaccines and 5 other global lifesaving temperature sensitive medicines) at public health facilities in Southwest Ethiopia, June 2017. Supplementary Table 2: indicator used to evaluate supply chain performances of cold chain products at public health facilities in Southwest Ethiopia, June 2017. Supplementary Table 3: distribution of public health facilities in different zones of two Ethiopian regional states supplied by the Jimma Pharmaceuticals Fund and Supply agency (PFSA) hub, Southwest Ethiopia, June 2017. Supplementary Table 4: sampling strategy for key informant interviews at public health facilities in Southwest Ethiopia, June 2017. [file 5167858.f1.pdf]

## List of supplementary Tables and Figures

**Supplementary Table 1: - Lists of 13 Essential temperature sensitive medicines (8-WHO tracer vaccine and 5-other global lifesaving temperature sensitive medicines), June, 2017**

| S/N | Key cold chain products                                | NO. of doses in vial  |
|-----|--------------------------------------------------------|-----------------------|
| 1   | BCG vaccine                                            | 10 –dose vial vaccine |
| 2   | OPV                                                    | 20 –dose vial vaccine |
| 3   | Penta vaccine                                          | 10 –dose vial vaccine |
| 4   | Measles vaccine                                        | 5 –dose vial vaccine  |
| 5   | TAT                                                    | 10 –dose vial vaccine |
| 6   | Rabies vaccine                                         | 1-vial vaccine        |
| 7   | Khaletra(lopinavir /retinovir) fixed dose combination) | 1-vial                |
| 8   | Insulin (NPH)                                          | 1-vial                |
| 9   | Oxytocine                                              | 1-vial                |
| 10  | Ergometrine                                            | 1-vial                |
| 11  | HIV rapid test kit(BWT(Beiging Wentai))                | 1-vial                |
| 12  | TT vaccine                                             | 10 –dose vial vaccine |
| 13  | PCV                                                    | 10 –dose vial vaccine |

**Supplementary Table 2:-Indicator used to evaluate supply chain performances of cold chain products at public health facilities in southwest Ethiopia, June 2017**

| <b>Indicator used for the present study</b> |                                                |                                                                                                                                          |                                                                                                                                                                      |
|---------------------------------------------|------------------------------------------------|------------------------------------------------------------------------------------------------------------------------------------------|----------------------------------------------------------------------------------------------------------------------------------------------------------------------|
| <b>S/n</b>                                  | <b>Indicator</b>                               | <b>Definition</b>                                                                                                                        | <b>Formula</b>                                                                                                                                                       |
| 1                                           | % of PHFs with temperature medicines available | Tells number of PHF with adequately available key cold chain products from study public health facilities                                | $(\text{Number of public health facilities that have stock continuously available at a time of visit for } \geq 80\% \text{ of key cold chain products} / 47) * 100$ |
| 2                                           | Average stock out duration                     | Tells duration for which key cold chain products were out of stock at each PHF                                                           | $(\text{Sum of stock out days} / 13)$                                                                                                                                |
| 3                                           | stock out rate                                 | Tells the rate at which key cold chain products were out of stock at study public health facilities                                      | $(\text{No. of health facilities assessed that experienced a stock out of key cold chain products} / 47) * 100$                                                      |
| 4                                           | Inventory record accuracy rate                 | Measures accuracy of stock balances in stock ledger(card) over range of key cold chain products                                          | $(\text{Number of item where stock record count equals to physical stock count} / 13) * 100$                                                                         |
| 5                                           | % of PHFs that had accurate LMIS reports       | Measures percentage of PHFs having no discrepancy between balance stated on the stock card and the LMIS reports                          | $(\text{number of public health facilities with no discrepancies} / 47) * 100$                                                                                       |
| 6                                           | Wastage rate                                   | Measures % of stock of key cold chain products wasted (unusable) during last one year                                                    | $(\text{Unusable stock quantity key cold chain products over one year period} / \text{total stock quantity of key cold chain products over one year period}) * 100$  |
| 7                                           | % of PHF with acceptable storage condition     | Measures percentage of PHFs that fulfilled at least 80% storage condition defined in checklist for evaluation of cold chain storage unit | $(\text{Number of public health facilities storage unit that fulfilled 80\% of storage condition} / 47) * 100$                                                       |

**Supplementary Table 3:- The distribution of public health facilities in different zones of two Ethiopian regional states supplied by Jimma Pharmaceutical fund and supply agency (PFSA) Hub, June, 2017)**

| S/n   | Regional states                                                    | Zones districts             | number<br>of health<br>facilities | proportional<br>sample size of<br>health facilities |
|-------|--------------------------------------------------------------------|-----------------------------|-----------------------------------|-----------------------------------------------------|
| 1     | Oromiya<br>regional state                                          | Jimma zones’ districts      | 133                               | 20                                                  |
| 2     |                                                                    | I/Ababorzones’ districts    | 42                                | 6                                                   |
| 3     |                                                                    | Buno-Bedelezones’ districts | 27                                | 4                                                   |
| 4     | Southern nation,<br>nationalities and<br>peoples regional<br>state | Kaffazones’ districts       | 47                                | 7                                                   |
| 5     |                                                                    | Bench-Maji zones’ districts | 40                                | 6                                                   |
| 6     |                                                                    | Shekazones’ districts       | 14                                | 2                                                   |
| 7     |                                                                    | Konta zones’ districts      | 4                                 | 1                                                   |
| 8     |                                                                    | Yem specialworeda           | 6                                 | 1                                                   |
| Total |                                                                    |                             | 313                               | 47                                                  |

**Supplementary Table 4:- The sampling strategy for Key informant interviews for the present study (2017)**

| Institution              |                | Selected site                                                | Selected KI                                                    | Total |
|--------------------------|----------------|--------------------------------------------------------------|----------------------------------------------------------------|-------|
| Public health facilities | hospitals      | Jimma zone [Agaro general hospital]                          | One CEO, Store manager and EPI Focal person per each hospitals | 4     |
|                          |                | I/Ababor zone [Metu karl hospital]                           |                                                                | 4     |
|                          |                | Kaffa zone [Gabra tsadik shawo hospital]                     |                                                                | 4     |
| PFSA                     | Central PFSA   | Pharmaceutical Forecasting and capacity building directorate | Directors/responsible managers/                                | 1     |
|                          |                | Cold room management unit                                    |                                                                | 1     |
|                          | Jimma PFSA hub | Distribution and storage directorate                         |                                                                | 1     |
